# Supplementary material
Source: PubMed Central journal article supplement (PMC3659406)
Supplement: NIHMS468468-supplement-SI_figures.pdf [file NIHMS468468-supplement-SI_figures.pdf]

# Supplementary Figures

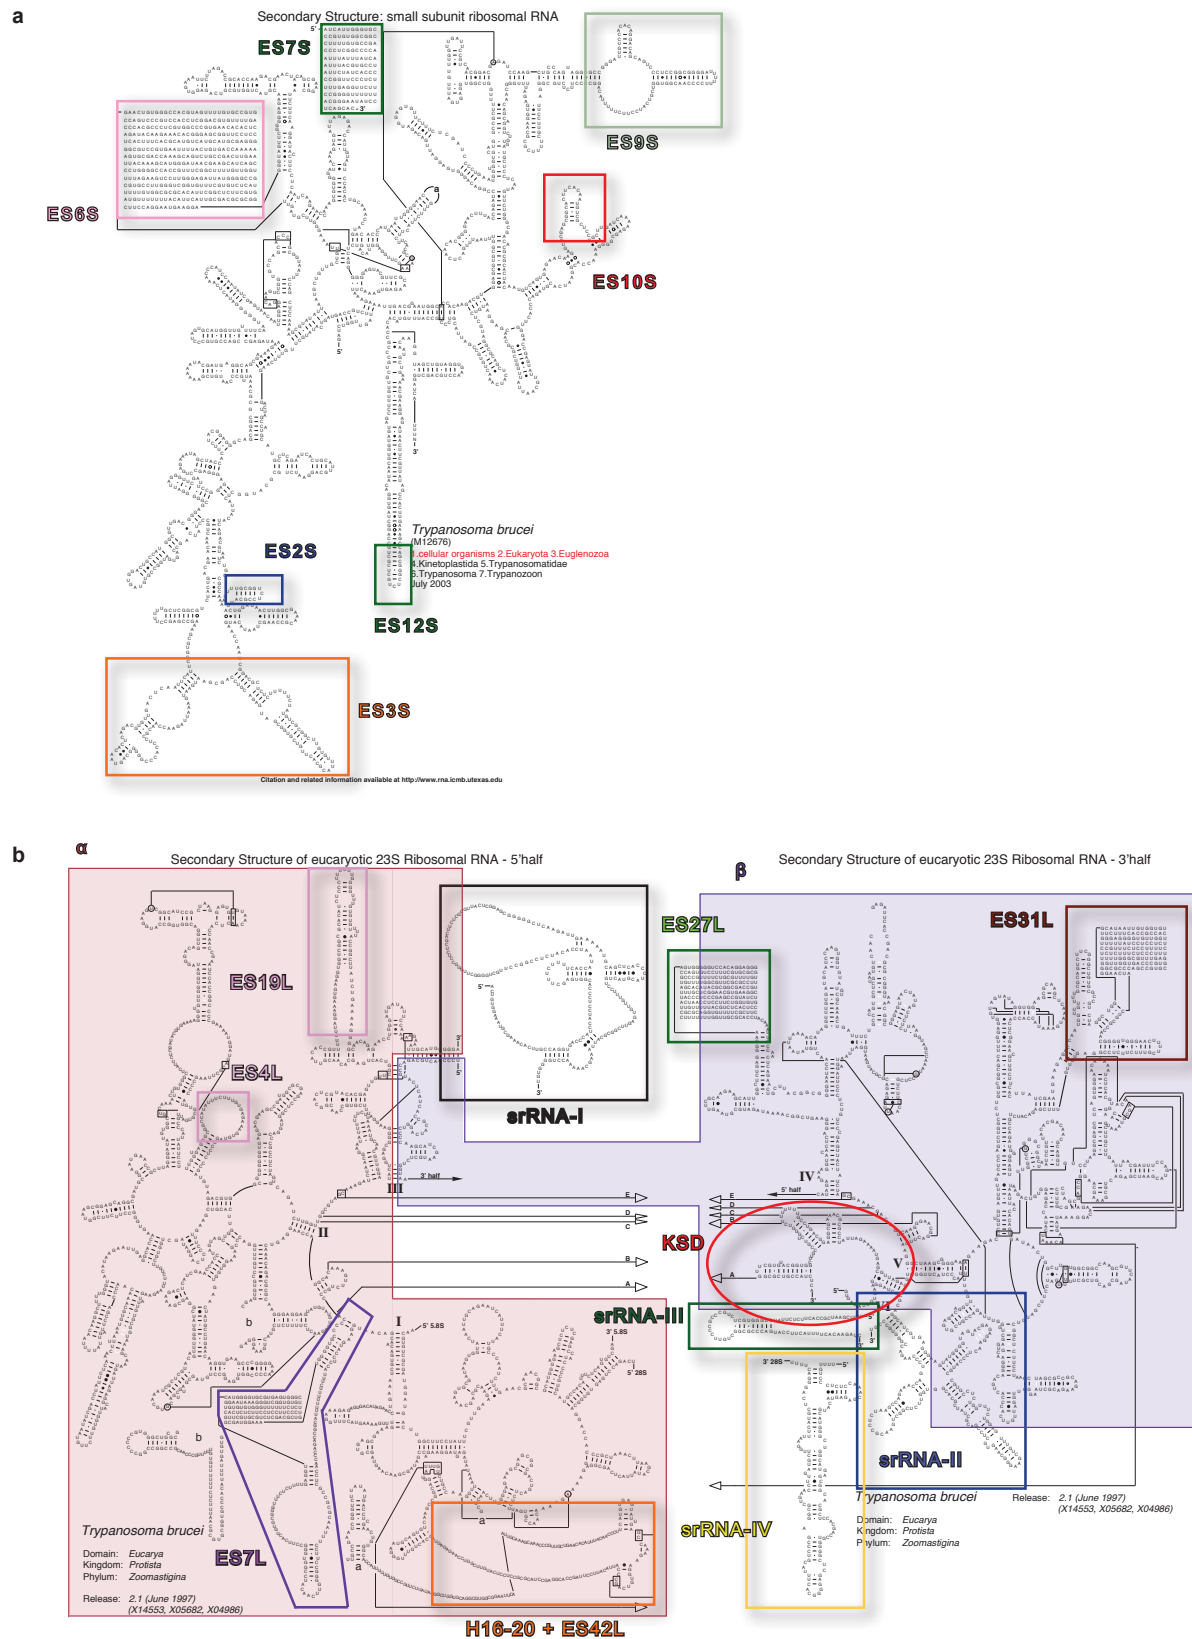

**Supplementary Figure 1. Secondary structures (2D) of both subunits rRNAs of the *T. brucei* ribosome.** The secondary structures are fetched from the CRW site<sup>26</sup>. (a) Secondary structure of the SSU rRNA chain (18S), highlighted in colored frames are the largest expansion segments. (b) Secondary structure of the LSU rRNA chains, a (orange transparent area), b (purple transparent area), srRNA-I (black frame), srRNA-II (blue frame), srRNA-III (forest frame) and srRNA-IV (yellow frame). Largest expansion segments are highlighted in colored frames and the Kinetoplastid-Specific Domain (KSD) is circled in red.

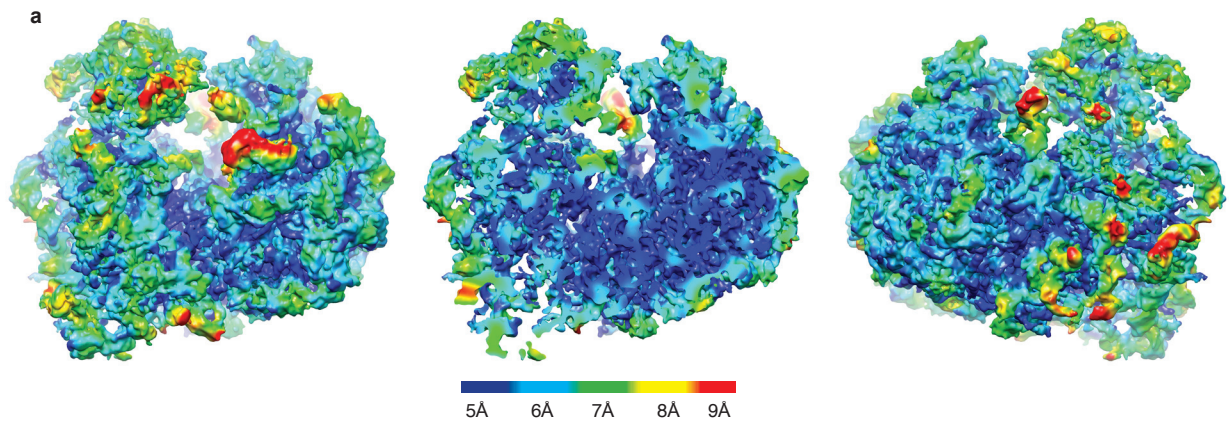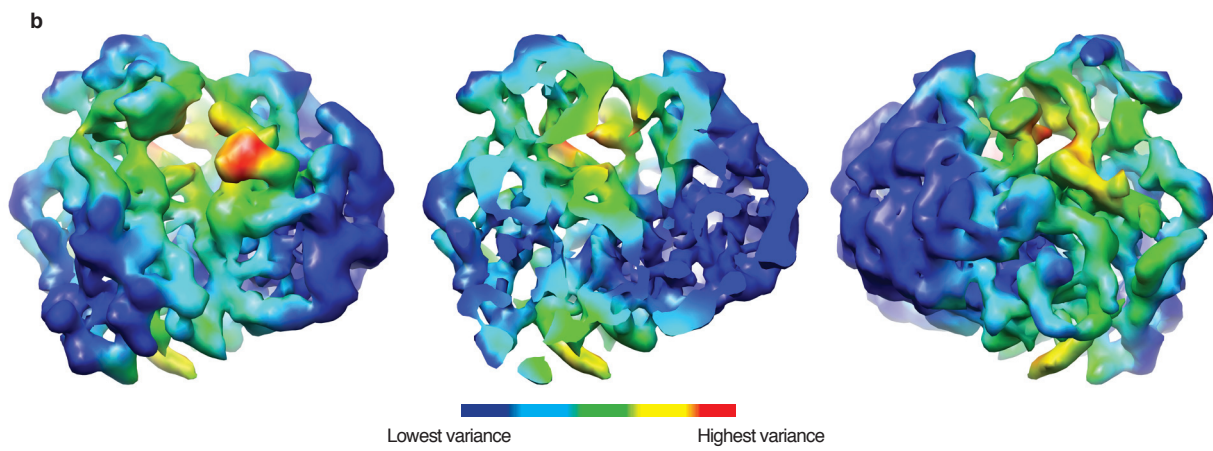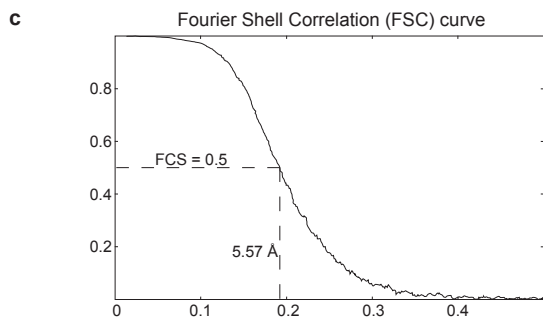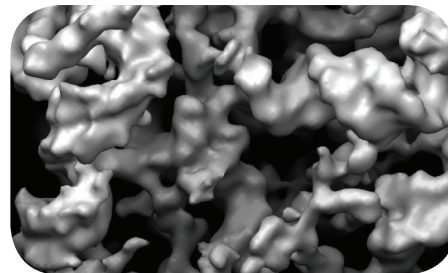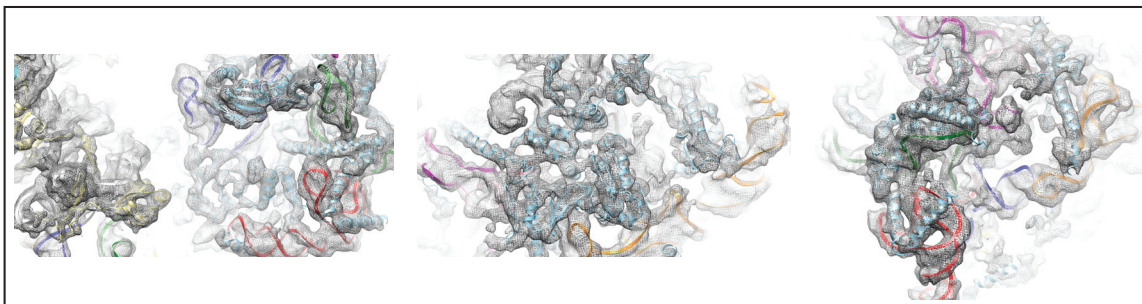

Fig. S2 continued on next 4 pages...

d

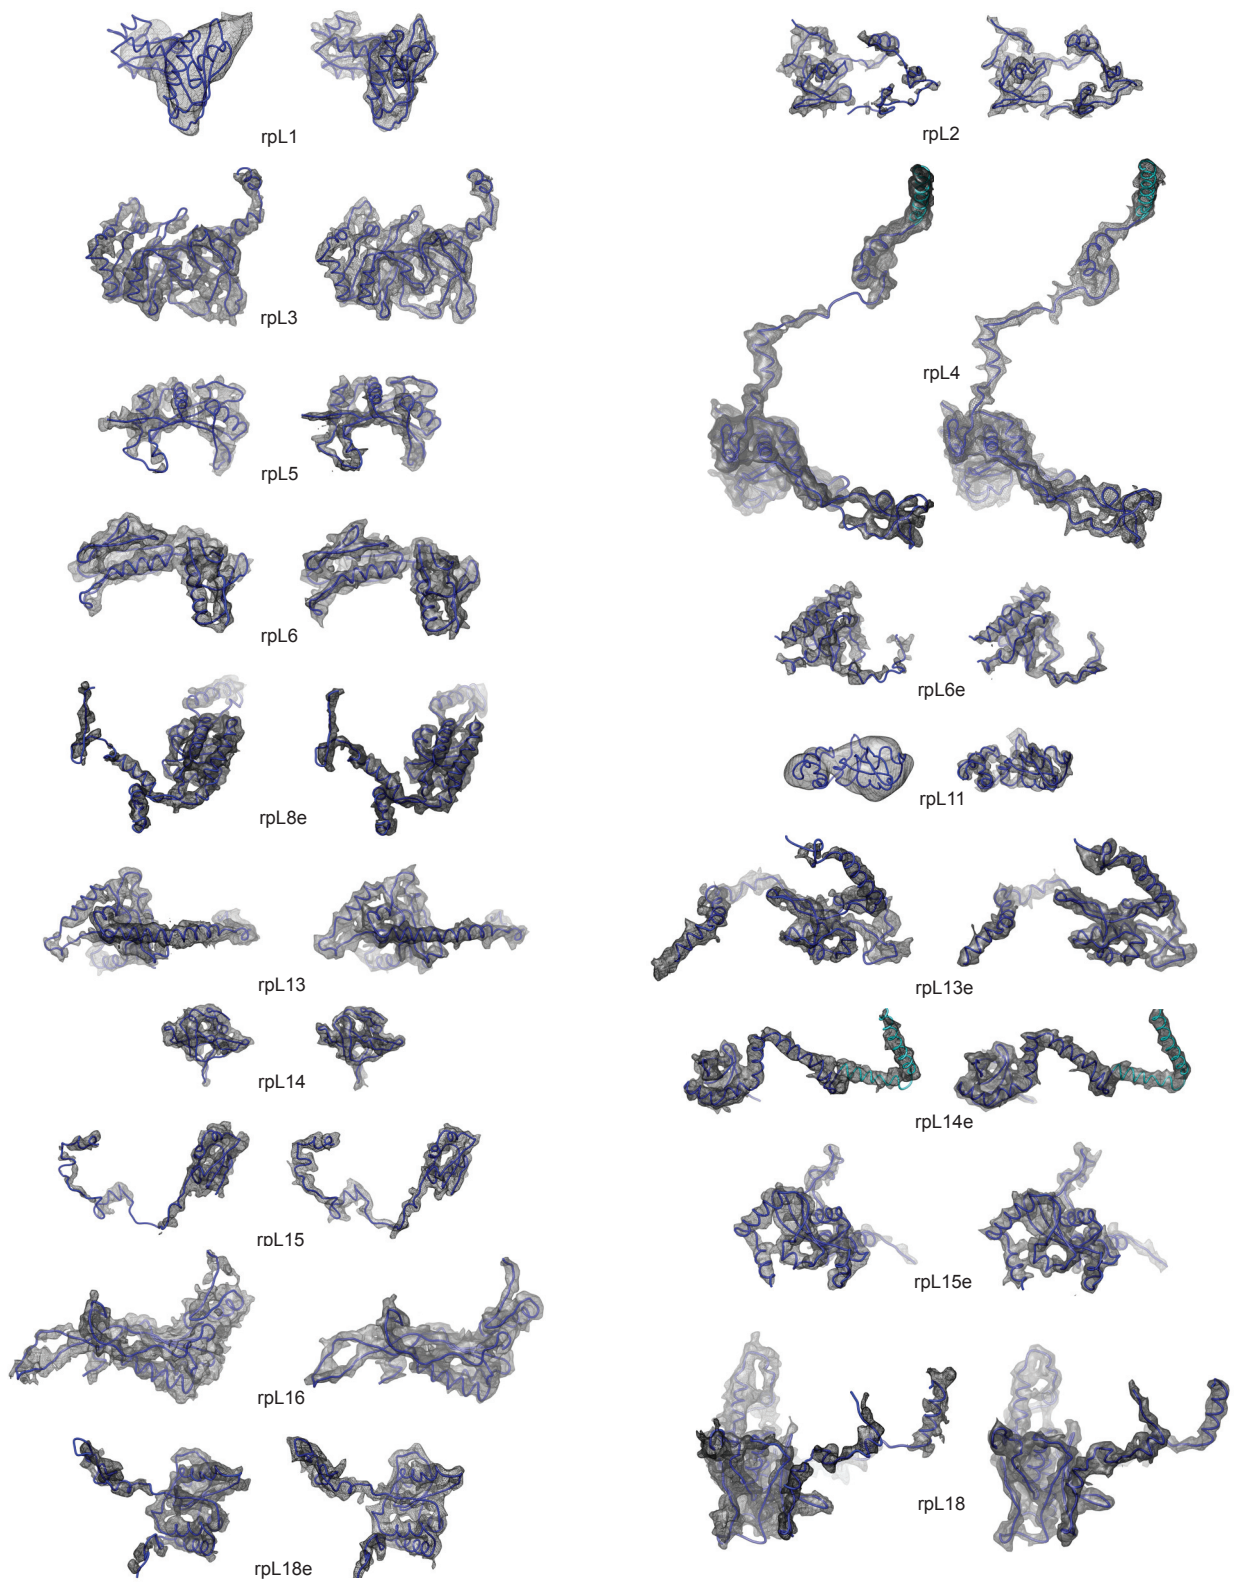



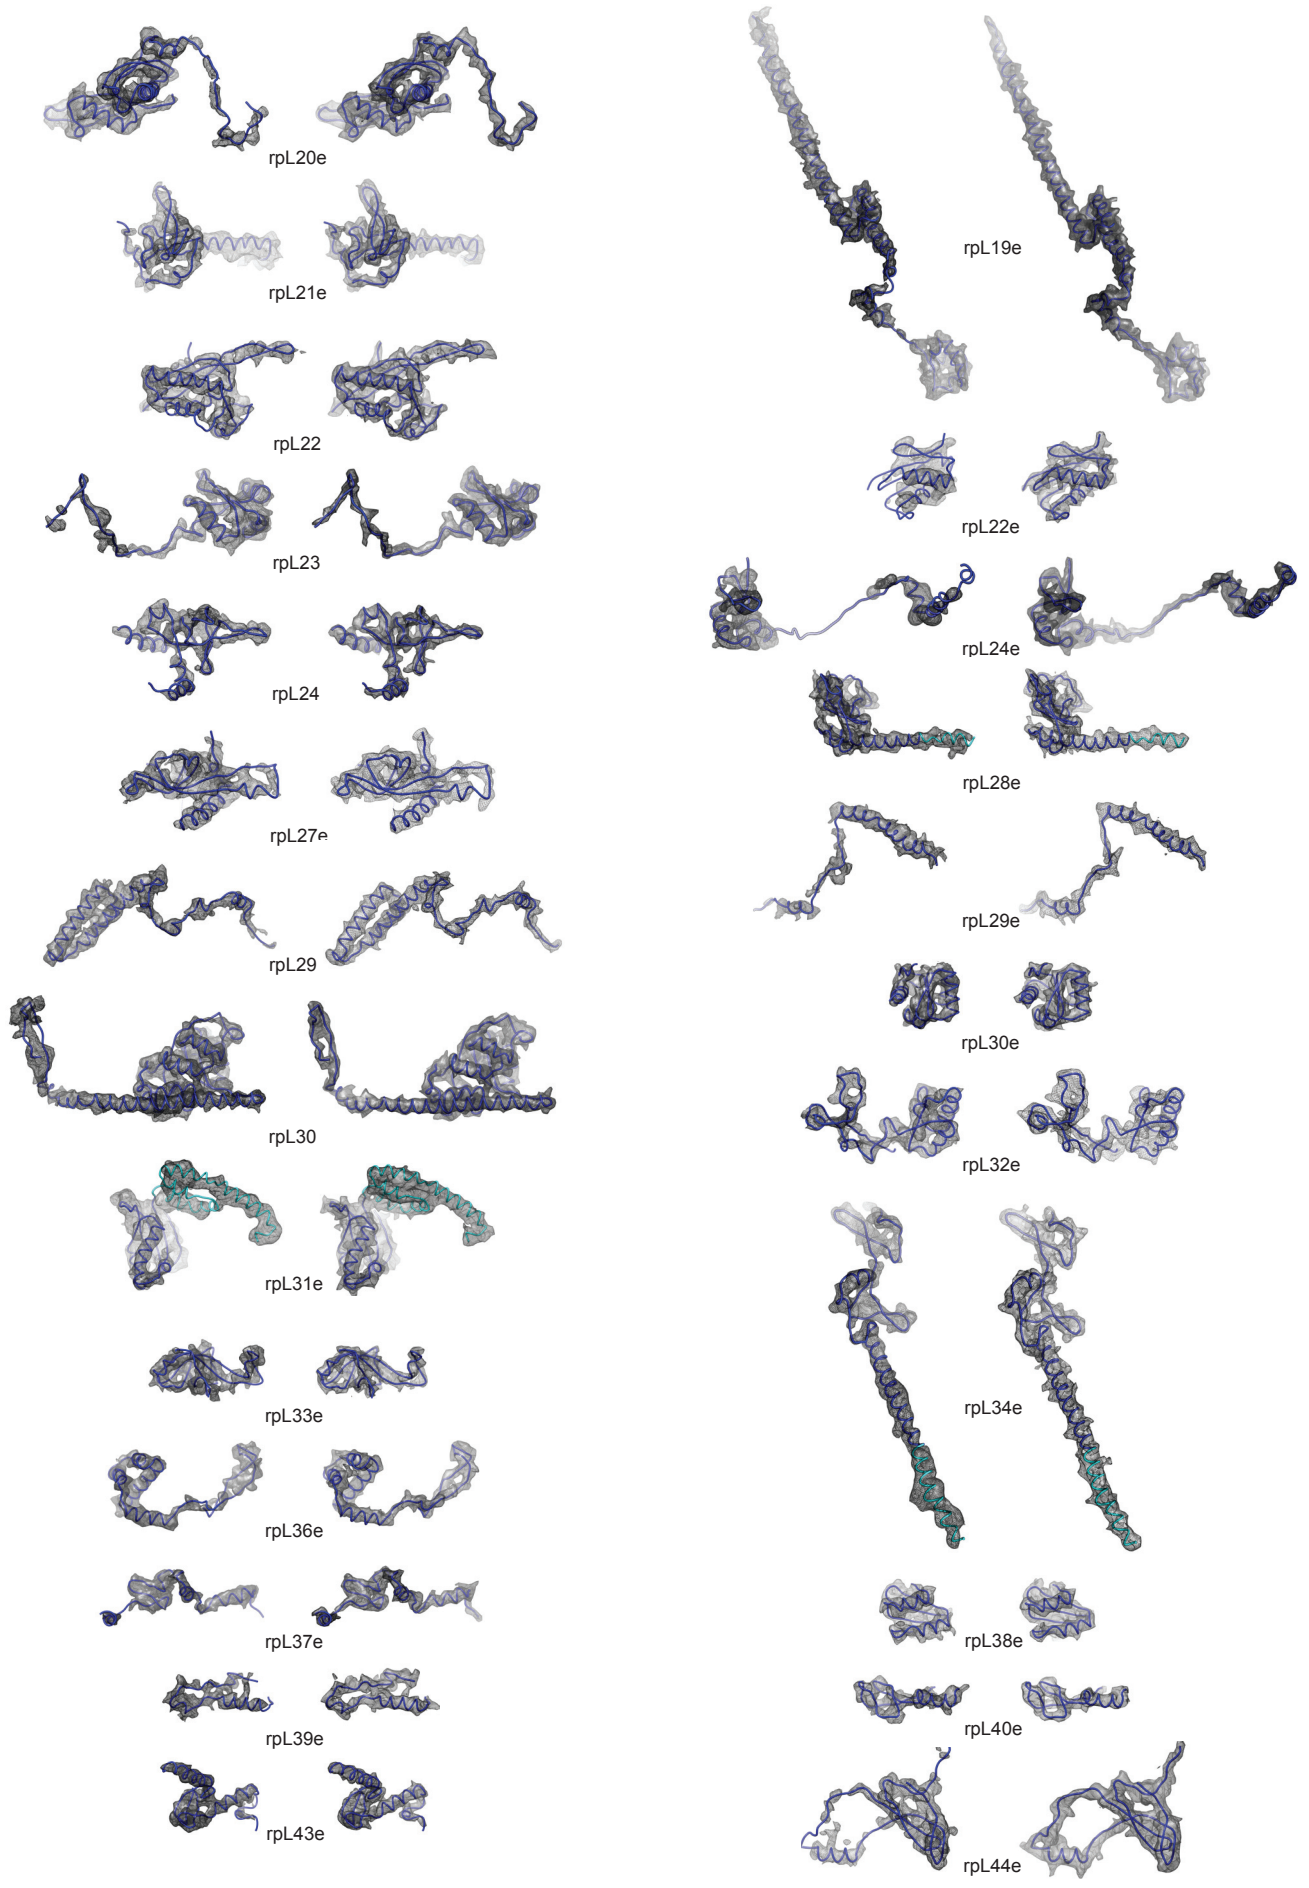



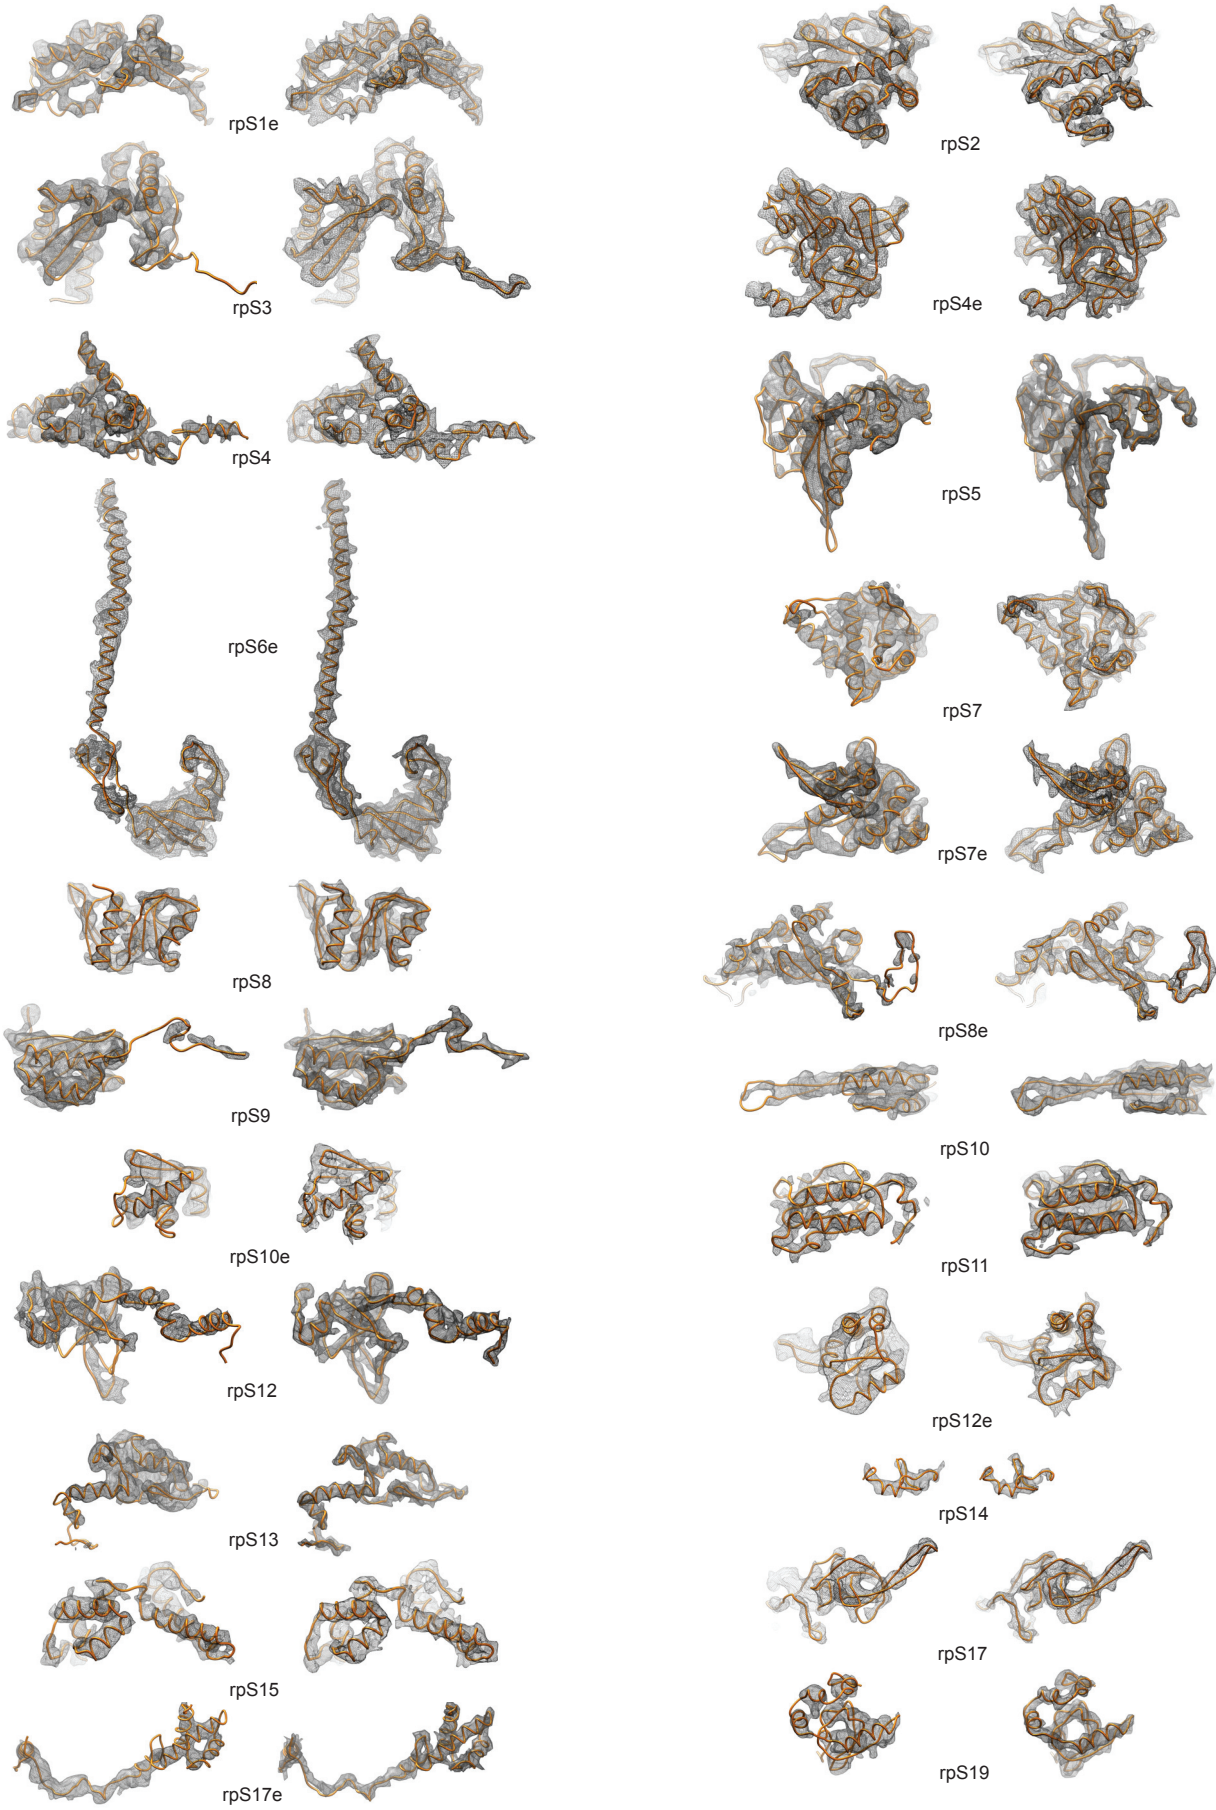

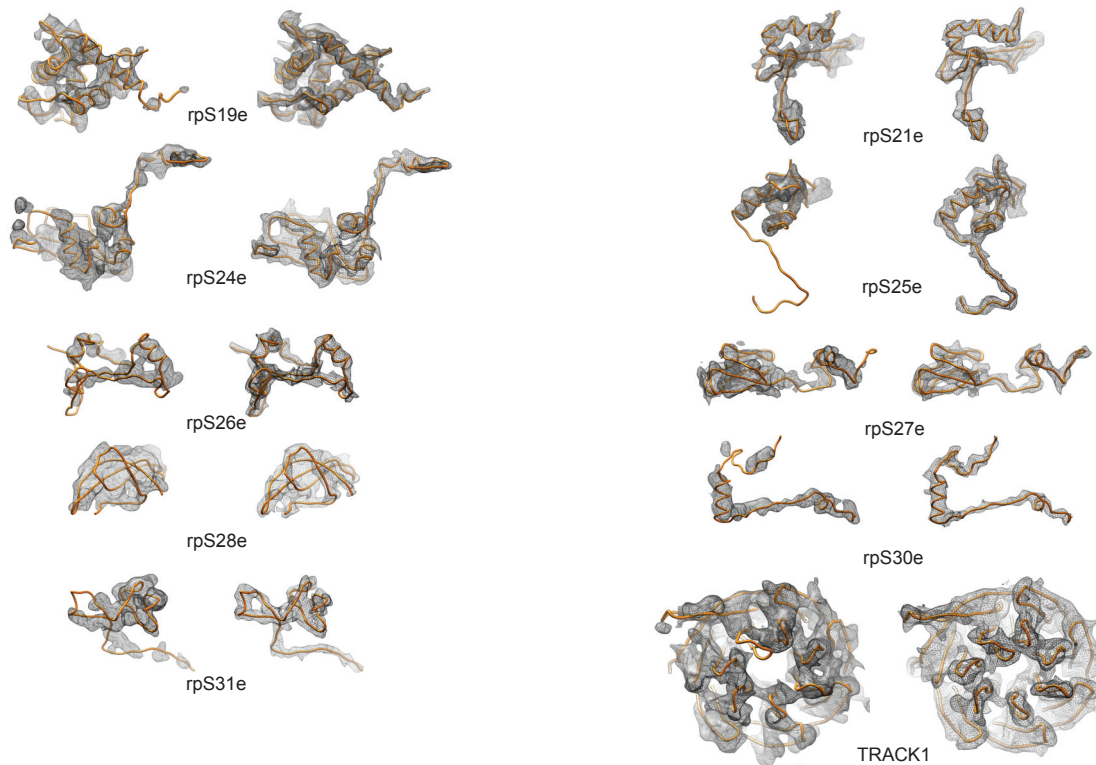

**Supplementary Figure 2. Resolution of the *T. brucei* cryo-EM reconstruction.** (a) *T. brucei* ribosome Cryo-EM map filtered and colored according to the measured local resolution (see Methods). The map displays a variable resolution from 5Å (dark blue) to 9Å (red), see color key. Left, front view (P-stalk side). Middle, a section of the map viewed from the front. Right, back view (L1-stalk side). (b) *T. brucei* ribosome Cryo-EM map colored according to the computed 3D variance (see Methods), from dark blue for the lowest variance to red for the highest variance. The map is filtered to the resolution at which the 3D variance was estimated (~ 20 Å). Left, front view (P-stalk side). Middle, a section of the map viewed from the front. Right, back view (L1-stalk side). (c) Up-left: Fourier Shell Correlation (FSC) curve displaying the average nominal resolution of the entire 3D reconstruction using FSC=0.5. x-axis = spatial frequency, y-axis = FSC. Pixel size is 1.09 Å. Up-right: an image of the *T. brucei* cryo-EM map, at the KSD region, showing the rRNA phosphate density bumps and indications of the proteins side chains, typical for the measured resolution (~5.0 Å). Bottom: selected images demonstrating the quality of the atomic model fitting in the map. (d) Segments of all the ribosomal proteins of the *T. brucei* cryo-EM map, with their atomic models fitted in (see Methods). In each column, the cryo-EM map segments (left) are compared to simulated cryo-EM maps, generated from their atomic models (using Chimera<sup>12</sup>), at a resolution of 5.0 Å (right) with the atomic models fitted in. This comparison validates the measurements of the local resolution but also shows discrepancies in the resolution of various ribosomal proteins as some segmented proteins display less molecular details than their simulated density map. Proteins of the LSU are colored in blue, the SSU proteins are in orange.



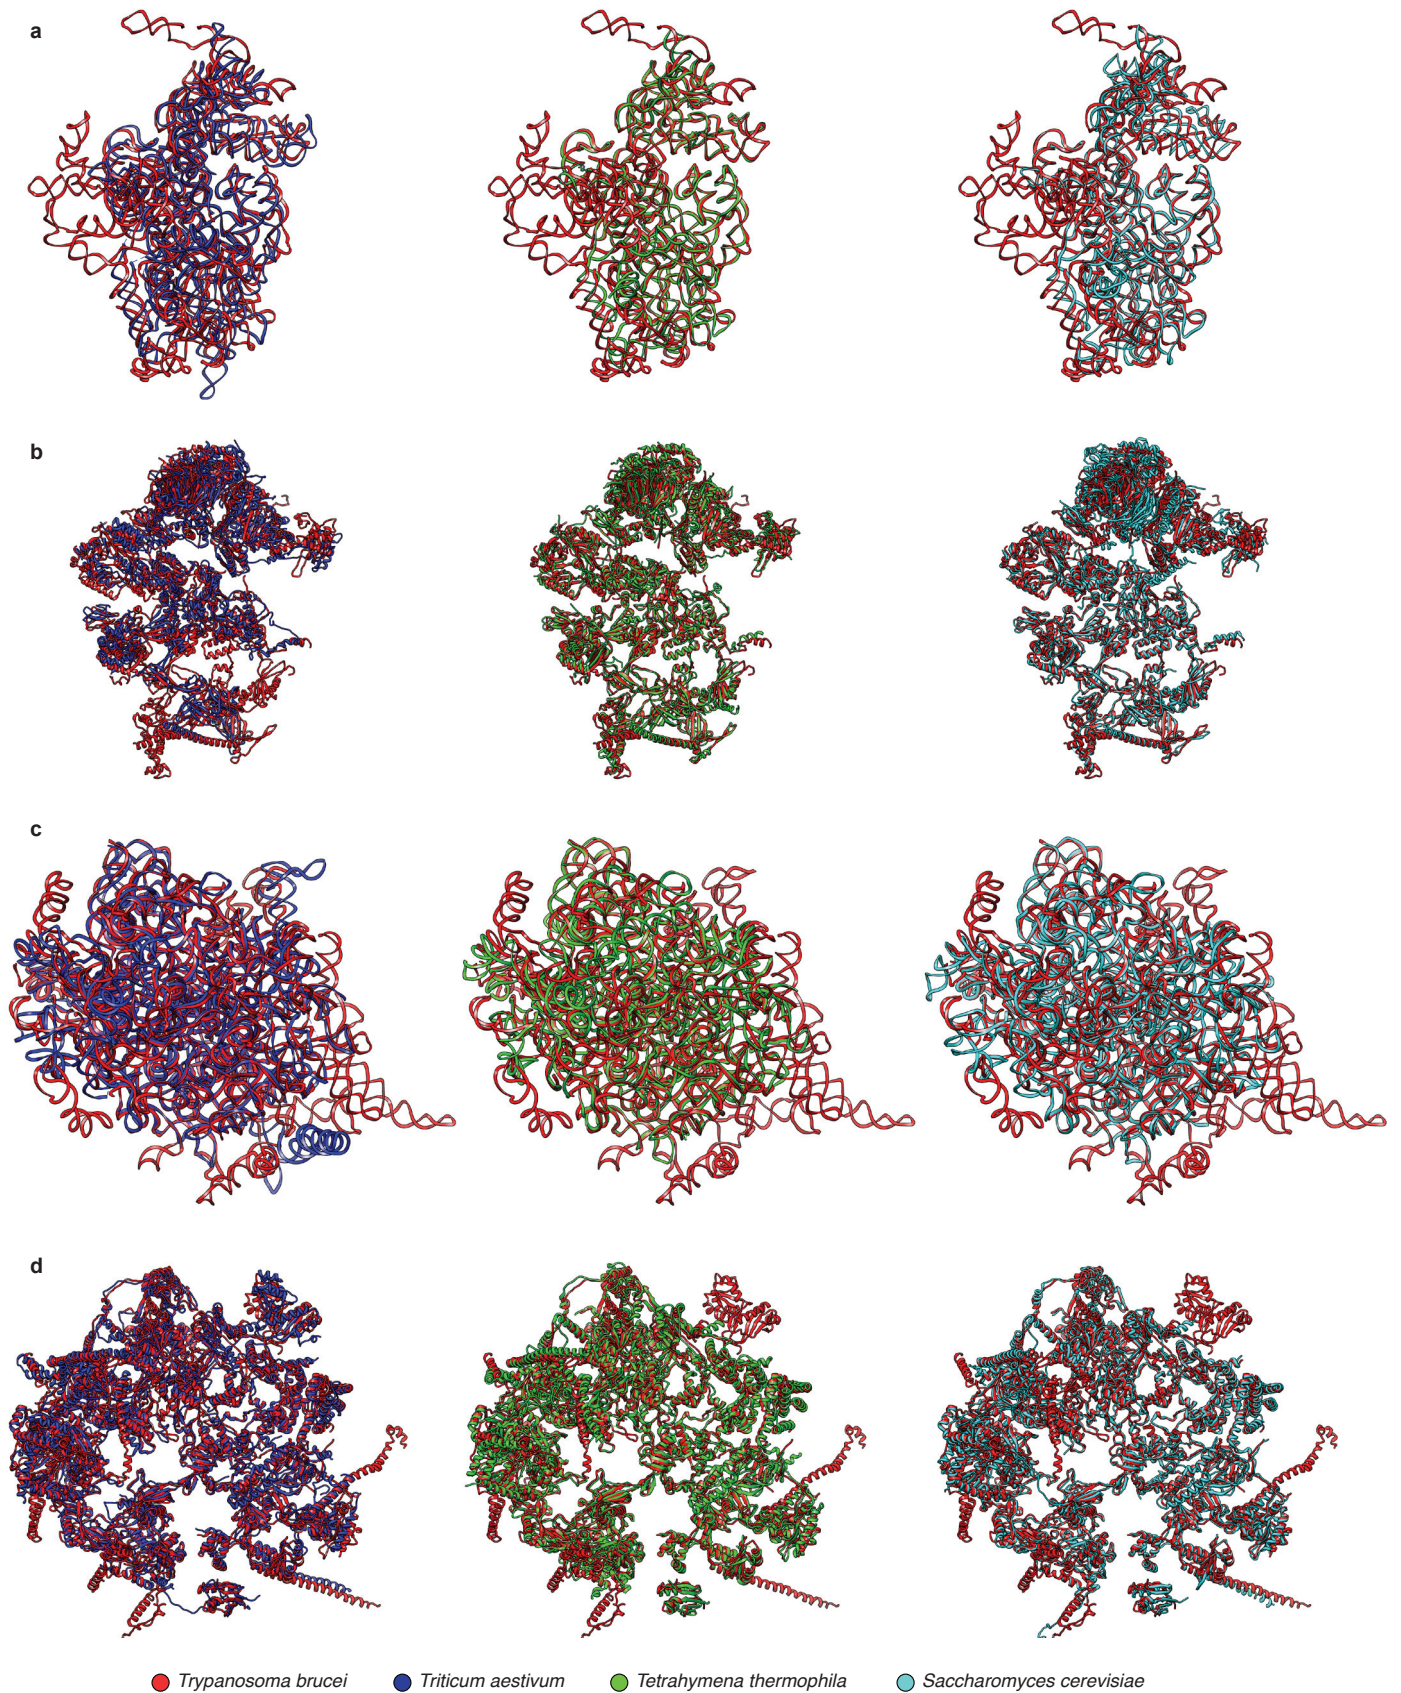

**Supplementary Figure 3. Comparison between the *T. brucei* ribosome (this study) with other available eukaryotic ribosomal structures.** Superimposition of the *T. aestivum* (left), *T. thermophila* (middle), *S. cerevisiae* (right) and the *T. brucei* ribosomal RNA and protein components: (a) SSU rRNA. (b) SSU ribosomal proteins. (c) LSU rRNA. (d) LSU ribosomal proteins.



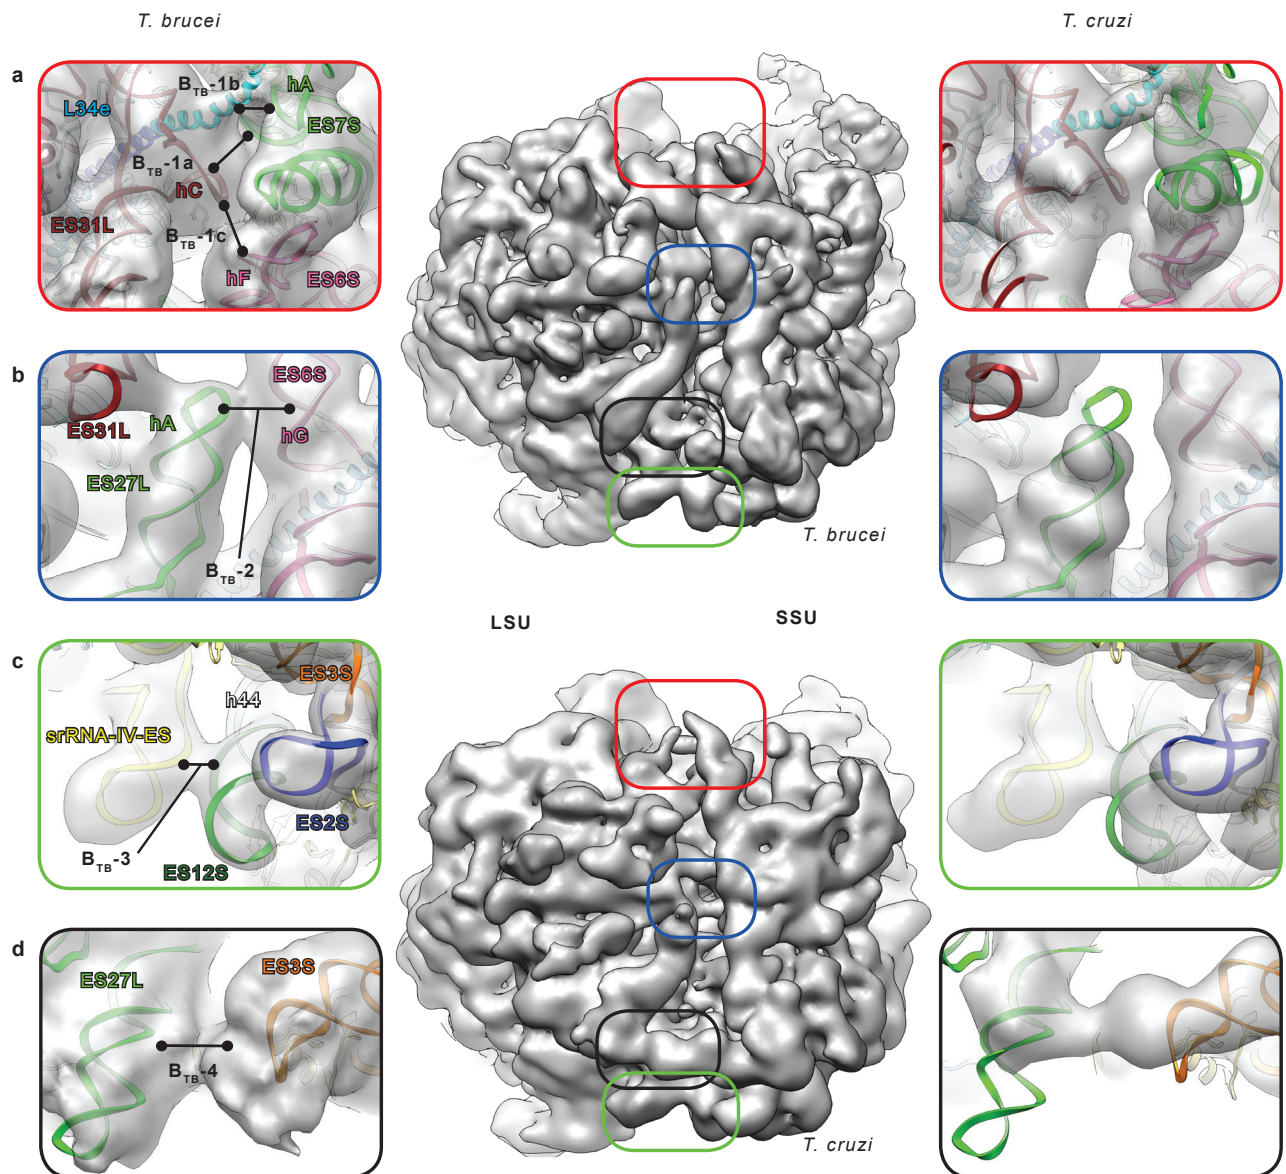

**Supplementary Figure 4. Comparison between *T. brucei* and *T. cruzi* additional ribosomal intersubunit bridges.** Cryo-EM maps of ribosomes from *T. brucei* (middle top) and *T. cruzi*<sup>14</sup> (middle bottom), displayed at the resolution of 12Å. The *T. brucei* 80S atomic model was rigid-body fitted into the previously published *T. cruzi* map. The trypanosome-specific bridges are highlighted on each map by colored frames for both, *T. brucei* (left) and their equivalents in *T. cruzi* (right). (a) B<sub>TB</sub>-1, formed by three contacts, a, b and c, (b) B<sub>TB</sub>-2, (c) B<sub>TB</sub>-3 and (d) B<sub>TB</sub>-4. Despite the similarity of the ribosomes from the two species, the *T. brucei* 80S model fitted into the *T. cruzi* cryo-EM map indicates differences in the conformation of some trypanosome-specific expansion segments.

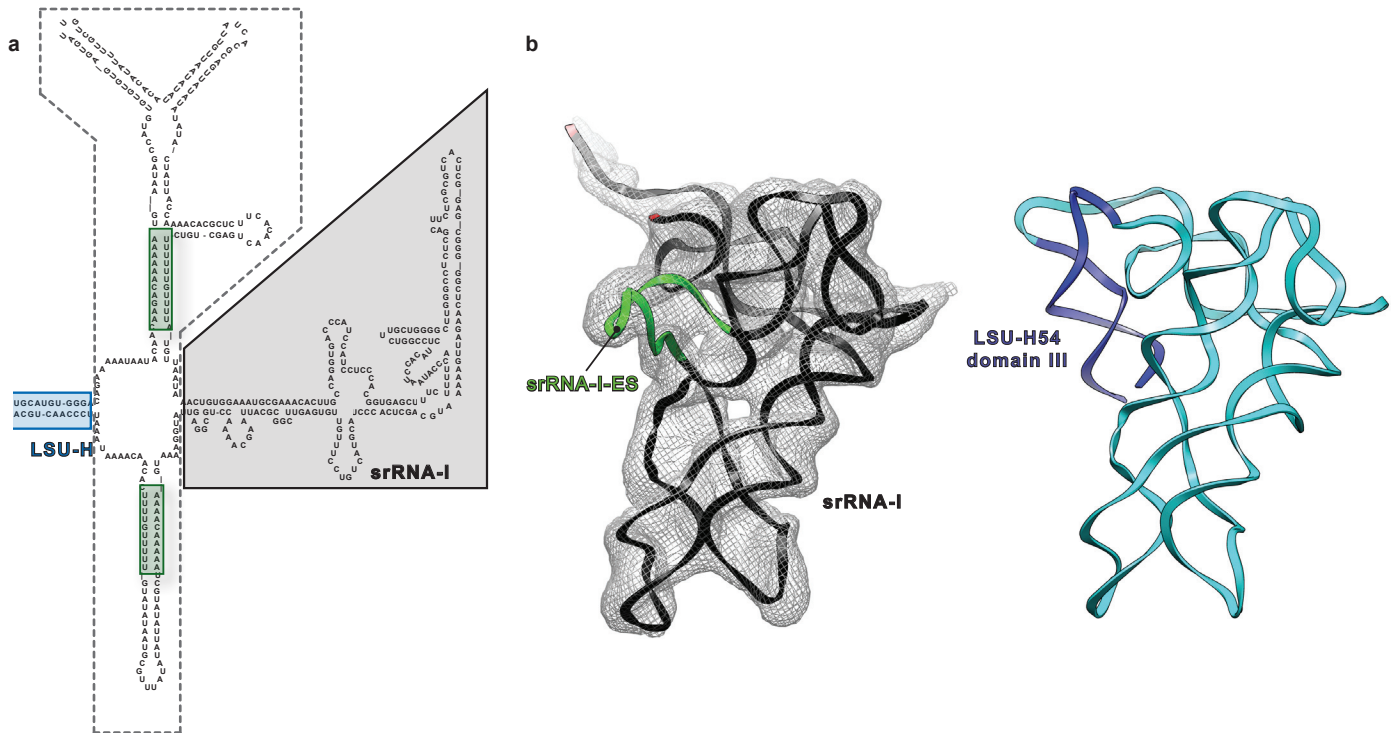

**Supplementary Figure 5. Short rRNA-I secondary and tertiary structures.** (a) Predicted secondary structure of the immature rRNA containing srRNA-I (according to ref. 12) (transparent gray area), adjacent to LSU helix 54 (transparent blue area), including srRNA-I flanking cleaved sequences (delimited by dashed lines). Although the predicted secondary structure of srRNA-I was revealed to be inaccurate by this study, it allows locating a conserved base-paired region (green transparent rectangles) symmetrically arranged with respect to the srRNA-I cleavage sites that might be part of the cleavage signal. (b) Comparison between *T. brucei* srRNA-I and its homologous rRNA region, adjacent to LSU helix 54 in domain III, in yeast.

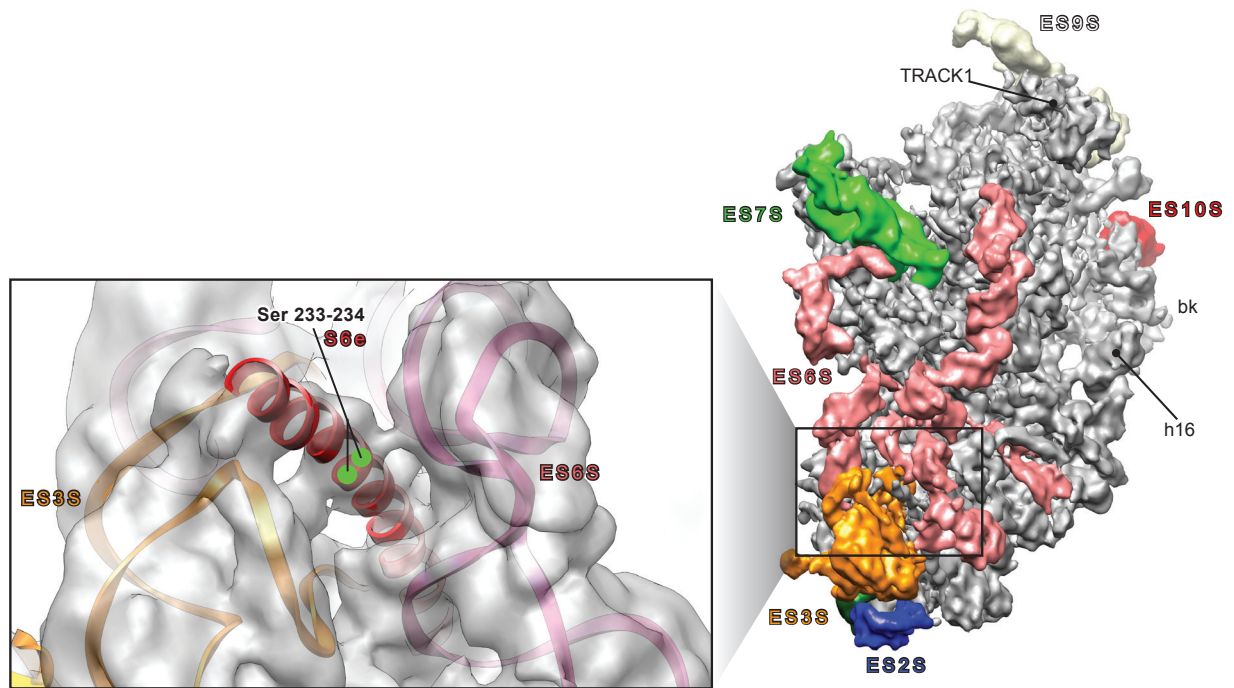

**Supplementary Figure 6. Interaction of S6e C-terminal tail with *T. brucei*-specific segments of SSU ESs 3S and 6S.** Close-up on a region in the SSU from the *T. brucei* cryo-EM map displaying the interaction of S6e C-terminal tail with SSU ESs 3S and 6S (left). The atomic model shows that segments of SSU ESs 3S and 6S form a tight rRNA tunnel surrounding serine residues 233 and 234 (their positions are highlighted by green spheres), part of the S6e C-terminal tail phosphorylation site. This tight rRNA tunnel could render the phosphorylation site inaccessible to the S6e kinases (RSK and S6K). The blown-up region in the *T. brucei* SSU is indicated by a black frame on the segmented map (right).





**eIF3 subunit 9 Tb427.05.2570**

Score = 144 bits (362), Expect = 5e-33, Method: Compositional matrix adjust.  
Identities = 152/657 (23%), Positives = 262/657 (40%), Gaps = 88/657 (13%)

Query 2 EDDGLMSNIIIVNGLPARVTPPEKRAMFLRHMFKKVSVDLGHDKPTIHPVLDEETHEHVAGA 61  
E DG+ S +I+V+ +P +V P+ R L+++ K+ G +P D +T+  
Sbjct 179 EADGIDS-VIVVDNVP-QVGPD-RLEKLNKVIHKIFSKFGKITNDYPPEEDGKTKGYI-- 233  
Query 62 FLT FATVNSAEDALARLNRFPTKTDILSTYRWKALKAASEPPEEYKPPPEMQDADADFA 121  
FL +A+ A DA+ + + K + + + +E+ PE + D  
Sbjct 234 FLEYASPAHAVDAVNADGKLDKQHTFRVNLFDPDFKYMTISDEWDIPEKQPFKDLGNL 293  
Query 122 HTMAEDSMARPOFFIKQGESFDVEWYWFNYTTLKAELYRKPRLKTDVSGVQWTEMRROK 181  
E++ R Q+ + +W+ + P+ + +WTE  
Sbjct 294 RYWLEEAECRDQYSVIFESGDRTSIFWNDVKD-----PVSIEERARWTE----- 337  
Query 182 RLDPLGVGALTSVRPMPAWSFTGRIMVSQHMGLKLGWGRKMHMLFEVTELDIKAFYIS 241  
T VR WS G + + H G+ LWGG K + + + + S  
Sbjct 338 -----TYVR-----WSPKGTYLATFHQRGIALWGGKFKQIQRFSSHQVQLIDFS 392  
Query 242 PQEKYLIVKSP-----KEVSVWNIIRLSKKIRVLGGLDSDKWPARIYNAEDELVA 283  
P E+YLV SP + + +W+I KR G G S WPI + + + + A  
Sbjct 383 PCERYLVTFSPMLDQDDPQAIIIWDILTGHKKR---GFHCESSAHWPIFKWSDHGKFFA 439  
Query 294 ISHAACLEPMGQKFLPYRAETMRALQVESNSETPVHSLVPLGKVAEWNPAVGNQMAILV 353  
M L +Y +M L +S L I G+K W+P GN +A V  
Sbjct 440 R-----MTLDLTLISYETPSMGLLKKK-----LKISGKDFSWSPG-GNIIAFWV 483  
Query 354 QGGSSEGWKIIIQNLVKKDVVRAEVIQRNLFQAORLDDLWHFQGTLLVVKVTKTNS-- 411  
++ + L + + I RN L W G +L VKV +T  
Sbjct 484 PEDKDI PARVTLMQLPTRQE-----IRVNLNFVVDCKLHWKNGDYLCVDRTPKGT 537  
Query 412 ---TEYSIFSVGVKSAAAYQLKVENGL---TPGRFAWKSPGPHFAVICEDRARTKGLGD 464  
T + IF + K + + + + L T FAW+P+G FAV+ + R  
Sbjct 538 QGVVTNFEIFRMREKQVPDVVEMKGLYFKTIIAFAWEPNGSKFAVLHGEAPRIS---- 593  
Query 465 TSEIRIYCIKK--QKLIHYIP-TSATHLFWAPRGRSLVATNYDKSTLHPYGINDSGACV 521  
+ Y +K + + +LI + A +W+P+G +V + + + S V  
Sbjct 594 ---VSFYHVKNNGKIELKMFQKQANTIFWSPQGFVVLAGLRSMNALAFVDTSDCTV 650  
Query 522 QLERTVSPVTDXTWDPTRGFYAAVVSALRNSGDNQFRIFDLNGRELMQSKVRSQLSHFWR 581  
+D WDPTR+ VS + DN + + + GR L + + + WR  
Sbjct 651 MNIAEHYMASDVEWDPTRGVVTVSVSWSHKVDNAYWLWTFQGRLLQKNNKDRFCQLLWR 710  
Query 582 PLAPPVLTAAEIKHIQDNLEYSQRVQNEVKEQKEREAEQSKEREKEEQYKRMK 638  
P P +L+ +IK I+ +L++YS+ + + + + EL + R E + +K K  
Sbjct 711 PRPPTLLSQEQIRQIKKDLKYSKIFEQKDRLSQSKASKELVERRRRTMMEDFRKRYK 767

**eIF3 subunit 10 Tb927.7.6090**

Score = 70.9 bits (172), Expect = 7e-10, Method: Compositional matrix adjust.  
Identities = 108/498 (22%), Positives = 216/498 (43%), Gaps = 60/498 (12%)

Query 127 LLLSSLSGISIDQRVKLDLYLPAEKIVGEVAREMLTFNVIGHGSKLLPIYLETTEKLIEL 186  
++LS+SG R L L P K + E R+ L +++ + + + Y + + + +  
Sbjct 127 VLLSAVSGEDTQDRTRDLLLTPVVKFLWESYRQCL--DLRNNRVERLYHDIAQQAFK 184  
Query 187 CRTYKFRAAIGHVADSFRVFLRFLLYPIRPKTKAYSTRAADALKIDRESFHROVTAQA 246  
C Y +A + D+ +D+ LR L I+ N++ + + + +S H + Q  
Sbjct 185 CLOYTRKAEFRKLCDN-----LRMHLISQIRHNNQSTAINLNNP---ESQSMHLETRLVQ 236  
Query 247 KTVSVFCOLLEALIAVSNQGAWRTECFKVLAKTKQHEDFRKSQSDAYLVMATLFWEC 306  
L++ I++ WQ A++ +E + + +K+ + ++ Y ++T+FW+  
Sbjct 237 -----LDSAISMELWQEAFAKAVEDIHGLFSLSKKPPK-PQLMANYNKVSTVFWKS 286  
Query 307 SCYSFHAHCLLSAAFLADDERK-----ESLSRAVLAALCPNIGKRESFARGSDS-- 357  
FHA L L+ + RK + + +R +LA L +P R AR D  
Sbjct 287 GNALFHASTLHRLYHLSREMRKNLTQDEMQRNSTRVLLATLSIPITPERTDIARLLDMG 346  
Query 358 -FFQKNEQIAKLLDLKEAPSRNPLVQRMQMQLLQ-AAP--KGVAVVLELLRNEVDFGEA 413  
+K ++A LL L+ P+R L+ M + +LQ P K + +E+ N + E  
Sbjct 347 IIVEKORLATALGLQAPPTRIGLINDMVRFNVLQVYVPEVKDLYNLEVEFNPLKLCER 406  
Query 414 SSRAIAQVSVVQKQDSLEKYQOPLRKKVVMKRFLEYMATKVRVEASSLR----IWESEQ 469  
++ + V + +K+ L++Y L+ + R L+ ++ +E S L ++ Q  
Sbjct 407 VTKVLNWRVREQPEKEPELQYVPLQNNITLRLQLQVSIQYQSEFSLTSLVFPVDAFQ 466  
Query 470 SEGAVNEIEPYLHESGITVEIDHKTNSITFSNATKIKVLEAFDPTLAHQVQLQPAAS-R 528  
E A V+ + V IDH + + + + F + E + H+Q P+ R  
Sbjct 467 LERAIVDAA-----RHCDLQVRIDHTSRFLSFGSDLNATRED-APIGPHLQSMPSQIR 520  
Query 529 RKLD-----IKPDHLRLVHERTRNLNQOQSCEEAEEQRKDAKLREREKRSK 576  
+L IKP H+ +E+ +Q R+ + + R + + +  
Sbjct 521 NQLTAMSSVLAKALEVIKPAHI--LQEKEEQ--HQLAVTAYLKNRKEHQRIARRQTE 576  
Query 577 ERAERIENEKKEEAADL 594  
ER ER+E+ +E +L  
Sbjct 577 ERKERLESLNIREKEEL 594

**Supplementary Figure 7. Alignment of conserved eIF3 subunits with their human homologs.** 8 subunits in total were found after running a blast against human eIF3 subunits. The *T. brucei* eIF3 subunits annotations are consistent with the blast results except for eIF3 subunit 5 that was found annotated as subunit 8 of the *T. brucei* proteasome, and without further analysis it is unclear to which complex it really belongs. Subunits names are in blue, in red the gene names in *T. brucei* and highlighted in green the identity and homology cores. Query = *T. brucei*, sbjct = *Homo sapiens*.

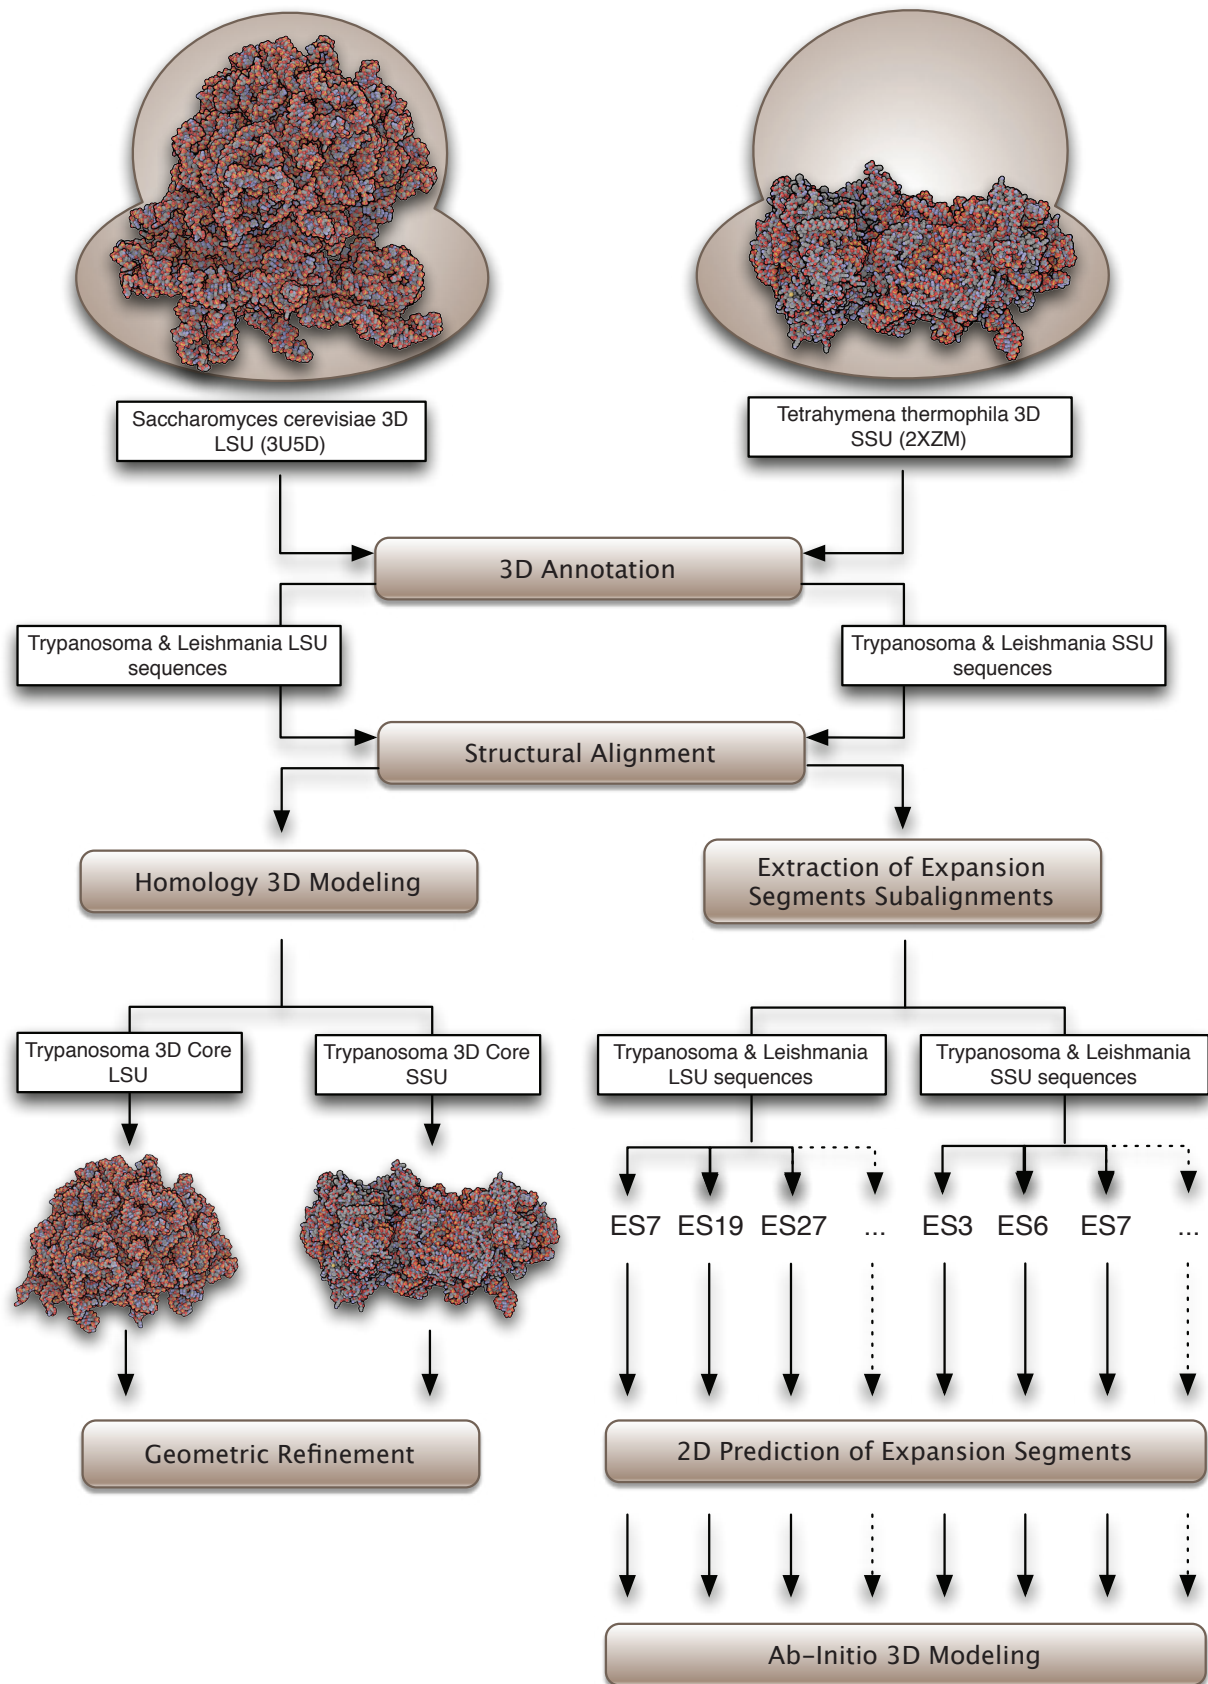

**Supplementary Figure 8. rRNA modeling workflow.** The *T. brucei* LSU conserved RNA core was modeled by homology to the X-ray structure of the yeast ribosome and the SSU RNA conserved core was modeled by homology to the *T. thermophila* 40S in complex with eIF1. The *T. brucei* ESs were modeled *ab initio* based on covariation analysis from orthologous rRNA sequences found in other kinetoplastids. Only few ESs from each subunit are mentioned as an example.



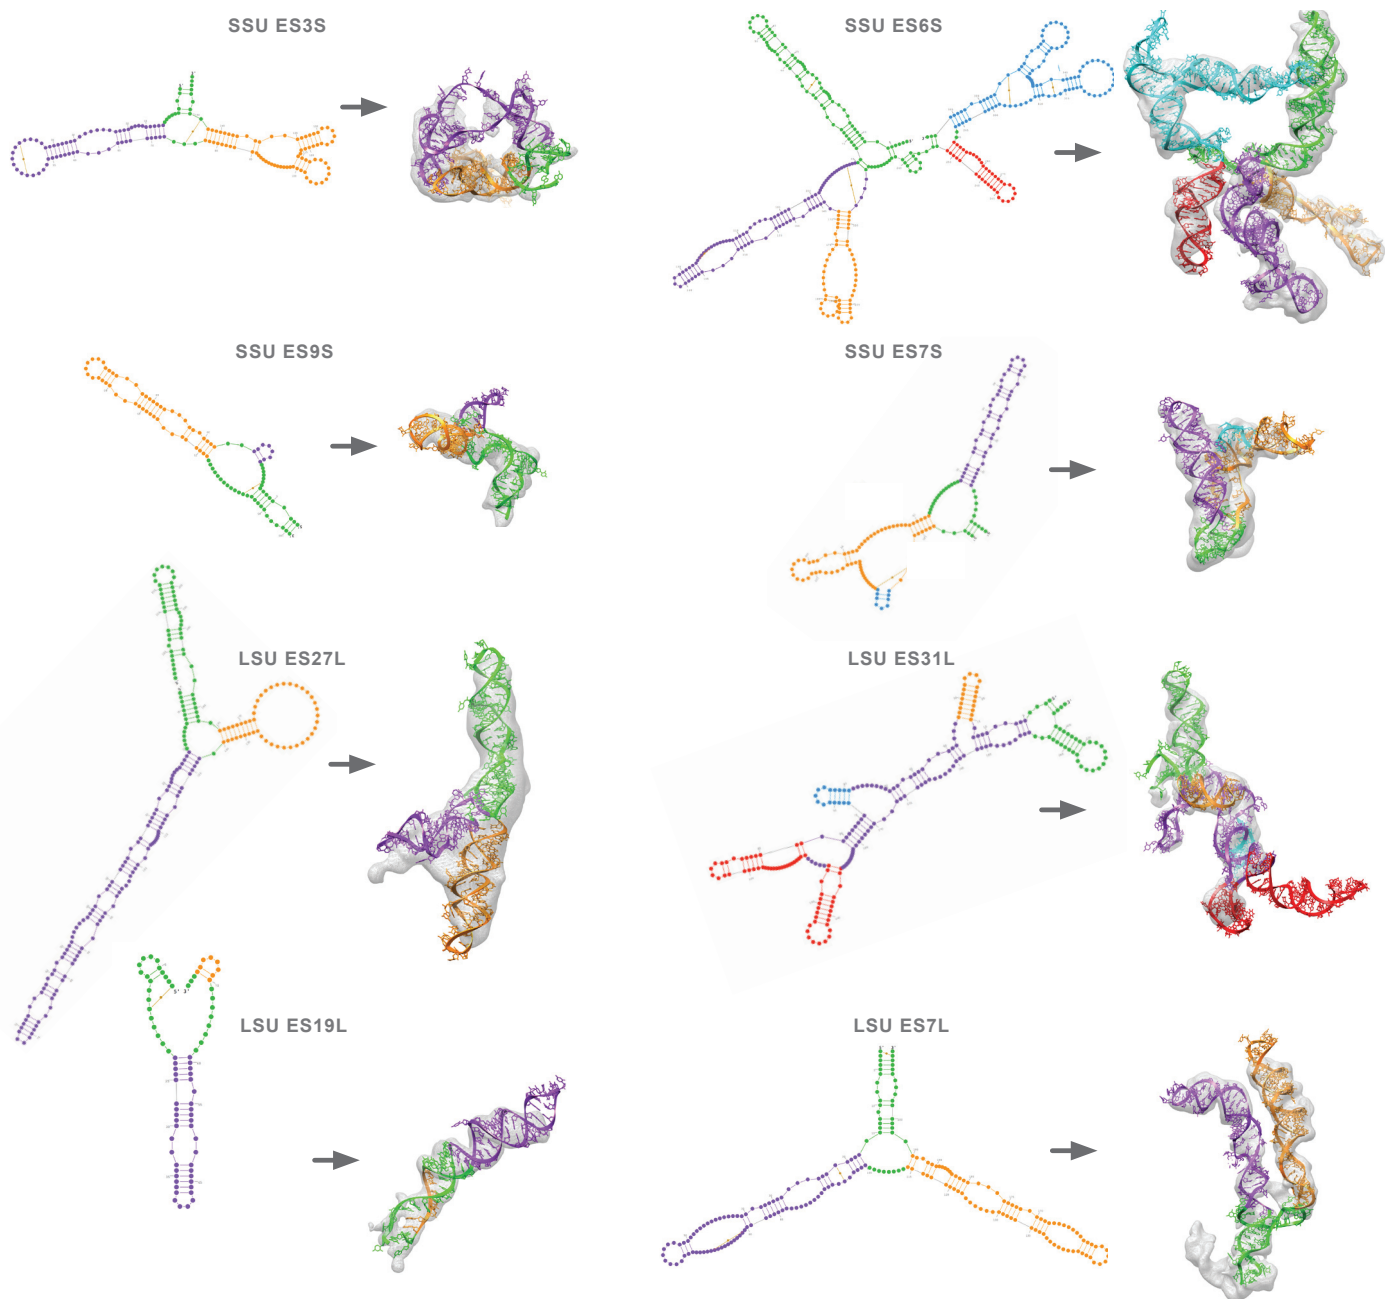

**Supplementary Figure 9. *T. brucei* rRNA ESs modeling.** For all displayed *T. brucei* ESs: (Left column) secondary structure models calculated based on the alignment and the covariation analysis. (Right column) Based on these secondary structure models, 3D models are then constructed interactively directly into the ES density maps (Not yet fitted by MDFF). Almost in all cases, some parts of the 2D models had to be modified in order to better fit the topology displayed by the cryo-EM map. The list of ESs displayed is not exhaustive, only largest ESs on each subunit are displayed. For every displayed ES, each secondary structure element conserves the same color in both columns, the secondary and 3D structures. Some parts of the displayed segmented ESs density maps can cover fully the fitted atomic model only when displayed at a lower density threshold due to the dynamic variability of the concerned part of the ES.

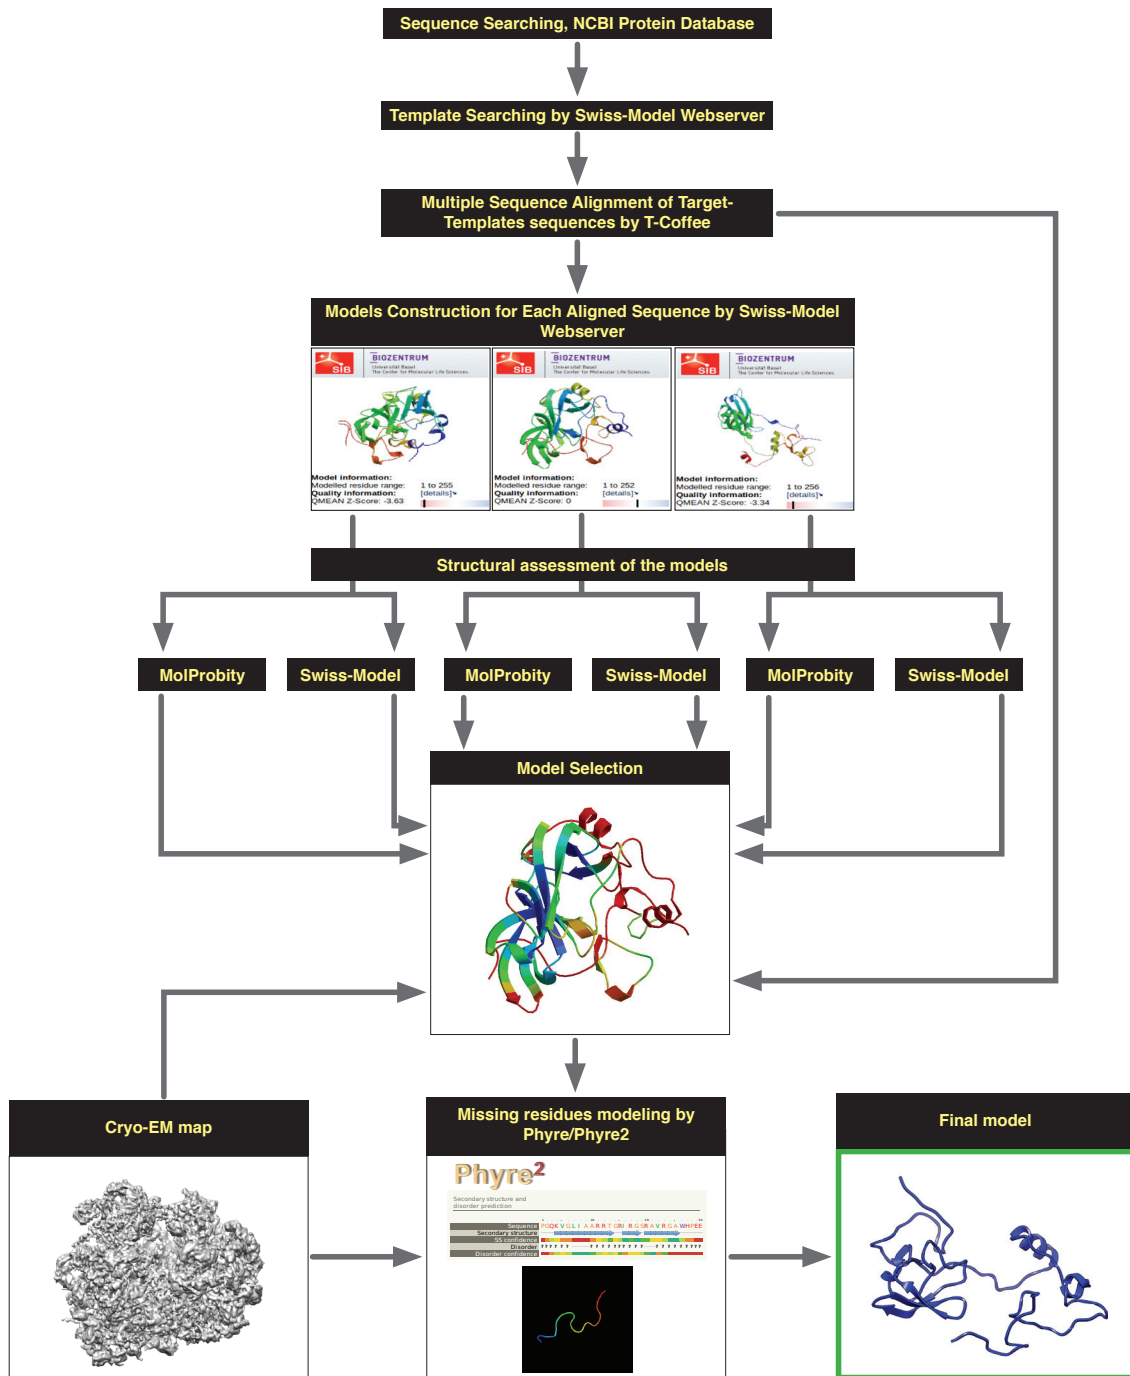

**Supplementary Figure 10. Ribosomal proteins modeling workflow.** The *T. brucei* proteins were modeled by homology to several X-ray structures. The ribosomal protein L2 is shown as an example, the modeling of all the ribosomal proteins follows the same workflow.

## Supplementary Tables

### Ribosomal proteins models

| Yeast name | <i>T. thermophila</i> name | NCBI GI#  | size, aa | Template's PDB ID | Range modeled, aa | Percentage modeled |
|------------|----------------------------|-----------|----------|-------------------|-------------------|--------------------|
| rpL1       | rpL1                       | 70833218  | 214      | 1DWU_D            | 1-214             | 100%               |
| rpL2       | rpL2                       | 74026238  | 260      | 3U5E_A            | 2-251             | 96%                |
| rpL3       | rpL3                       | 72387810  | 480      | 3U5E_B            | 53-480            | 89%                |
| rpL4       | rpL4                       | 72387341  | 374      | 3U5E_C            | 3-370             | 98%                |
| rpL5       | rpL11                      | 71744962  | 194      | 3U5E_J            | 13-180            | 86%                |
| rpL6       | rpL9                       | 71746626  | 189      | 3U5E_H            | 1-189             | 100%               |
| rpL6e      | rpL6                       | 71748584  | 192      | 3U5I_E            | 2-105, 142-192    | 80%                |
| rpL8e      | rpL8 (7a)                  | 72392339  | 276      | 3U5E_G            | 37-276            | 87%                |
| rpL11      | rpL12                      | 72393265  | 164      | 3O5H_L            | 7-144             | 84%                |
| rpL13      | rpL13a                     | 72389080  | 222      | 4A17_I            | 22-222            | 90%                |
| rpL13e     | rpL13                      | 72387001  | 218      | 4A18_U            | 1-214             | 98%                |
| rpL14      | rpL23                      | 71745556  | 139      | 3U5E_V            | 2-139             | 100%               |
| rpL14e     | rpL14                      | 2500363   | 186      | 4A18_F            | 2-184             | 98%                |
| rpL15      | rpL27a                     | 71745558  | 145      | 4A17_K            | 2-145             | 100%               |
| rpL15e     | rpL15                      | 71746212  | 221      | 3U5E_N            | 19-221            | 91%                |
| rpL16      | rpL10                      | 71745090  | 213      | 3U5I_I            | 2-213             | 100%               |
| rpL18      | rpL5                       | 71746208  | 308      | 3U5E_D            | 2-308             | 100%               |
| rpL18e     | rpL18                      | 71755183  | 193      | 3U5E_Q            | 2-193             | 100%               |
| rpL19e     | rpL19                      | 72391662  | 260      | 3U5E_R            | 1-200             | 77%                |
| rpL20e     | rpL18a                     | 71747154  | 179      | 3U5E_S            | 1-179             | 100%               |
| rpL21e     | rpL21e                     | 71754491  | 159      | 3U5E_T            | 2-159             | 100%               |
| rpL22      | rpL17                      | 71755285  | 166      | 4A17_Q            | 2-155             | 93%                |
| rpL22e     | rpL22                      | 74025028  | 130      | 4A18_M            | 21-123            | 83%                |
| rpL23      | rpL23a                     | 62359061  | 164      | 3U5E_X            | 44-164            | 73%                |
| rpL24      | rpL26                      | 71746108  | 143      | 4A17_S            | 2-125             | 87%                |
| rpL24e     | rpL24                      | 71747474  | 125      | 3U5I_W            | 1-125             | 100%               |
| rpL27e     | rpL27                      | 74026162  | 133      | 3U5E_Z            | 2-133             | 100%               |
| rpL28e     | rpL28                      | 71755559  | 146      | 4A18_O            | 5-144             | 95%                |
| rpL29      | rpL35                      | 71744004  | 127      | 3U5E_h            | 2-127             | 100%               |
| rpL29e     | rpL29                      | 74025002  | 71       | 3U5E_b            | 2-71              | 100%               |
| rpL30      | rpL7                       | 62176425  | 257      | 3U5I_F            | 1-257             | 100%               |
| rpL30e     | rpL30                      | 71747210  | 114      | 4A18_G            | 19-114            | 83%                |
| rpL31e     | rpL31                      | 71745684  | 188      | 3U5E_d            | 1-186             | 100%               |
| rpL32e     | rpL32                      | 71746464  | 132      | 3U5E_e            | 2-129             | 97%                |
| rpL33e     | rpL35a                     | 72387888  | 149      | 3U5E_f            | 34-149            | 78%                |
| rpL34e     | rpL34                      | 74024942  | 170      | 3U5E_g            | 2-152             | 89%                |
| rpL36e     | rpL36                      | 71746214  | 109      | 4A18_Q            | 2-107             | 97%                |
| rpL37e     | rpL37                      | 71754935  | 84       | 3U5E_j            | 2-84              | 100%               |
| rpL38e     | rpL38                      | 71744028  | 82       | 3U5E_k            | 2-82              | 100%               |
| rpL39e     | rpL39                      | 72393111  | 51       | 3U5E_l            | 2-51              | 100%               |
| rpL40e     | rpL40                      | 302393731 | 52       | 3U5E_m            | 1-52              | 100%               |
| rpL43e     | rpL37a                     | 71746454  | 93       | 3U5E_p            | 2-92              | 98%                |
| rpL44e     | rpL44                      | 62359897  | 106      | 3U5E_o            | 2-106             | 100%               |

**Supplementary Table 1. LSU ribosomal proteins models.** Exhaustive list of the modeled *T. brucei* LSU proteins. Yeast name = names of the *T. brucei* LSU proteins according to the new nomenclature used in yeast X-ray structure<sup>13</sup>. *T. thermophila* name = names of the LSU proteins according to the nomenclature used in *T. thermophila* ribosomal LSU structures in complex with eIF6<sup>15</sup>. NCBI GI# = the numbers of the *T. brucei* ribosomal protein sequences in the NCBI database. Size is in amino acids (aa). Template PDB ID = the ID of the template structures in the PDB used for the modeling of the homologous *T. brucei* proteins. Range modeled = the modeled part(s) of the *T. brucei* LSU proteins, in amino acids (aa).



## Ribosomal proteins models

| Yeast name | <i>T. thermophila</i> name | NCBI GI#  | size, aa | Template's PDB ID | Range modeled, aa | Percentage modeled |
|------------|----------------------------|-----------|----------|-------------------|-------------------|--------------------|
| rpS1e      | rpS1                       | 71747174  | 256      | 3U5G_B            | 20-237            | 85%                |
| rpS2       | rpS0                       | 74025178  | 277      | 3U5C_A            | 41-243            | 73%                |
| rpS3       | rpS3                       | 71748612  | 214      | 3U5C_D            | 3-214             | 99%                |
| rpS4       | rpS9                       | 72392295  | 190      | 3U5C_J            | 2-187             | 98%                |
| rpS4e      | rpS4                       | 71755053  | 272      | 3U5C_E            | 2-255             | 90%                |
| rpS5       | rpS2                       | 71749200  | 266      | 2XZM_E            | 40-262            | 84%                |
| rpS6e      | rpS6                       | 71746448  | 250      | 3U5C_G            | 2-250             | 100%               |
| rpS7       | rpS5                       | 71755579  | 190      | 2XZM_G            | 4-190             | 98%                |
| rpS7e      | rpS7                       | 71744362  | 202      | 3U5G_H            | 2-192             | 94%                |
| rpS8       | rpS15a                     | 72387207  | 130      | 3U5C_W            | 2-130             | 100%               |
| rpS8e      | rpS8                       | 72393291  | 220      | 3U5C_I            | 2-219             | 99%                |
| rpS9       | rpS16                      | 72390870  | 149      | 3U5G_Q            | 2-149             | 100%               |
| rpS10      | rpS20                      | 71402828* | 117      | 2XZM_J            | 12-115            | 89%                |
| rpS10e     | rpS10                      | 71747454  | 172      | 3U5C_K            | 1-101             | 59%                |
| rpS11      | rpS14                      | 62359856  | 144      | 3U5G_O            | 7-144             | 96%                |
| rpS12      | rpS23                      | 71746622  | 143      | 3U5C_X            | 2-143             | 100%               |
| rpS12e     | rpS12                      | 71755181  | 144      | 2XZM_U            | 24-144            | 83%                |
| rpS13      | rpS18                      | 71747448  | 153      | 3U5C_S            | 1-146             | 95%                |
| rpS14      | rpS29e                     | 71402016* | 57       | 3U5C_d            | 16-57             | 74%                |
| rpS15      | rpS13                      | 84043888  | 151      | 3U5C_N            | 2-151             | 100%               |
| rpS17      | rpS11                      | 71746518  | 174      | 3U5C_L            | 5-174             | 98%                |
| rpS17e     | rpS17                      | 74025356  | 142      | 3U5C_R            | 2-127             | 89%                |
| rpS19      | rpS15                      | 72391126  | 152      | 3U5G_P            | 22-148            | 84%                |
| rpS19e     | rpS19                      | 72387824  | 167      | 2XZM_T            | 19-167            | 89%                |
| rpS21e     | rpS21                      | 71755621  | 194      | 3U5C_V            | 6-85              | 40%                |
| rpS24e     | rpS24e                     | 71747828  | 137      | 3U5C_Y            | 2-137             | 100%               |
| rpS25e     | rpS25                      | 62175407  | 113      | 3U5C_Z            | 27-111            | 75%                |
| rpS26e     | rpS26                      | 71755959  | 111      | 2XZM_5            | 2-101             | 90%                |
| rpS27e     | rpS27                      | 74024940  | 86       | 3U5C_b            | 2-83              | 95%                |
| rpS30e     | rpS30                      | 72390075  | 66       | 3U5G_e            | 2-66              | 100%               |
| rpS31e     | rpS31e (27a)               | 72391394  | 155      | 3U5C_f            | 86-152            | 43%                |
| rpS28e     | rpS33                      | 72390708  | 103      | 3U5C_c            | 36-103            | 66%                |
| RACK1      | RACK1                      | 74025270  | 318      | 3DM0_A            | 1-314             | 99%                |

**Supplementary Table 2. SSU ribosomal proteins models.** Exhaustive list of the modeled *T. brucei* SSU proteins. Yeast name = names of the *T. brucei* SSU proteins according to the new nomenclature used in yeast X-ray structure<sup>13</sup>. *T. thermophila* name = names of the SSU proteins according to the nomenclature used in *T. thermophila* ribosomal SSU structure in complex with eIF1<sup>14</sup>. NCBI GI# = the numbers of the *T. brucei* ribosomal protein sequences in the NCBI database. \* = the sequences of these proteins couldn't be found for *T. brucei* and were taken from *T. cruzi* instead due to the evolutionary proximity of these two organisms, and the homology to *T. brucei* is further confirmed by the fit in the density map (see figure S2D). Size is in amino acids (aa). Template PDB ID = the ID of the template structures in the PDB used for the modeling of the homologous *T. brucei* proteins. Range modeled = the modeled part(s) of the *T. brucei* SSU proteins, in amino acids (aa).
